# Supplementary material
Source: Royal Society of Chemistry journal article supplement (doi:10.1039/d6tb00416d)
Supplement: d6tb00416d2.pdf [file d6tb00416d2.pdf]

1 **Tumor Cell Membrane-Engineered MXene Nanoplatfom**  
2 **for Chemo-Photothermal Immunotherapy of Bladder**  
3 **Cancer**

4 **Zijing Peng<sup>1\*</sup>, Zhengnan Huang<sup>2\*</sup>, Zhuofan Nan<sup>1\*</sup>, Yilin Yan<sup>2\*</sup>, Huaxing Li<sup>2</sup>, Zeyi Wang<sup>3</sup>, Wei**  
5 **Yao<sup>4</sup>, Xiaodong Zhu<sup>4#</sup>, Bing Shen<sup>1,2#</sup>, and Xiangqian Cao<sup>2#</sup>**

6 <sup>1</sup>Department of Urology, Shanghai General Hospital, Shanghai Jiao Tong University School of  
7 Medicine, Shanghai 200080, China

8 <sup>2</sup>Department of Urology, Shanghai Tenth People's Hospital, Tongji University School of Medicine,  
9 Shanghai 200072, China.

10 <sup>3</sup>Department of Urology, Huadong Hospital Affiliated to Fudan University, Shanghai, 200040,  
11 China.

12 <sup>4</sup>Department of Nanomedicine, Naval Medical University, Shanghai 200433, China

13

14 Zijing Peng<sup>1\*</sup>

15 Zhengnan Huang<sup>2\*</sup>

16 Zhuofan Nan<sup>1\*</sup>

17 Yilin Yan<sup>1\*</sup>

18 \*These authors contributed equally to this work

19

20 #Correspondence: Xiaodong Zhu, Department of Nanomedicine, Naval Medical University, 800

21 Xiangyin Road, Yangpu District, Shanghai, 200433, China, Tel/Fax +86 15800840088, Email

22 [xdzhu26@yeah.net](mailto:xdzhu26@yeah.net); Bing Shen, Department of Urology, Shanghai General Hospital, Shanghai

23 Jiaotong University School of Medicine, 85 Wujin Road, Hongkou District, Shanghai, 200080,

24 People's Republic of China, Tel/Fax +86 18017181979, Email [urodrshenbing@shsmu.edu.cn](mailto:urodrshenbing@shsmu.edu.cn);

25 Xiangqian Cao, Department of Urology, Shanghai Tenth People's Hospital, Tongji University

26 School of Medicine, 301 Yanchang Road, Jingan District, Shanghai, 200072, People's Republic of

27 China, Tel/Fax +86 18817314953, Email [cxqcaoxiangqian@163.com](mailto:cxqcaoxiangqian@163.com)

28

29

30

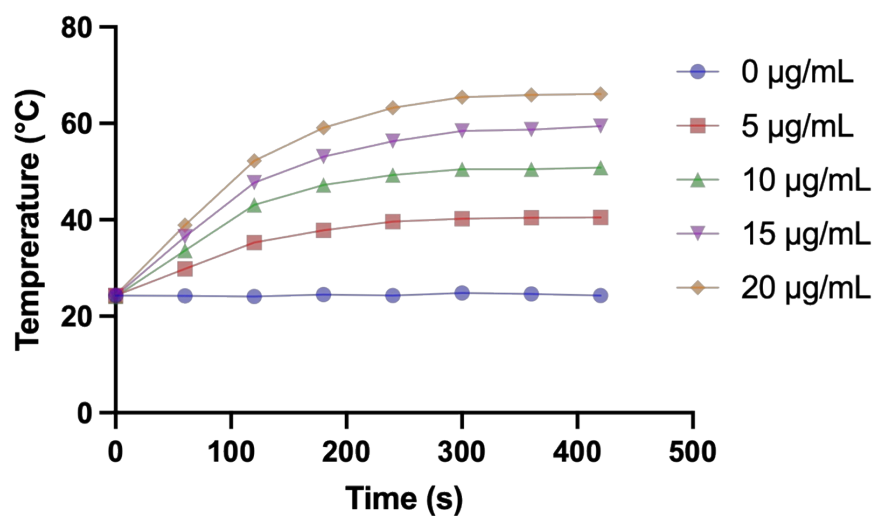

31

32 **Figure S1.** Temperature elevation profiles of MXene@TCM-DOX under 808 nm NIR laser

33 irradiation at different concentrations.

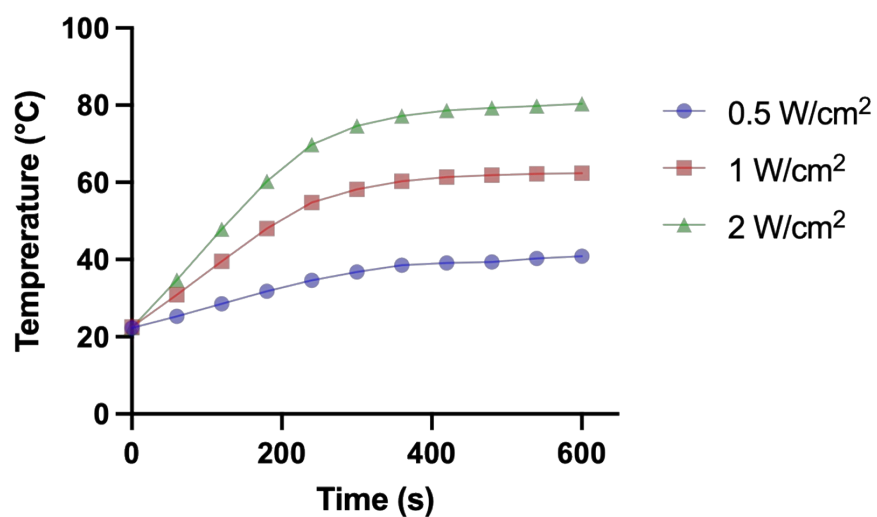

34

35 **Figure S2.** Photothermal heating curves of MXene@TCM-DOX under 808 nm NIR laser irradiation

36 at different power densities.

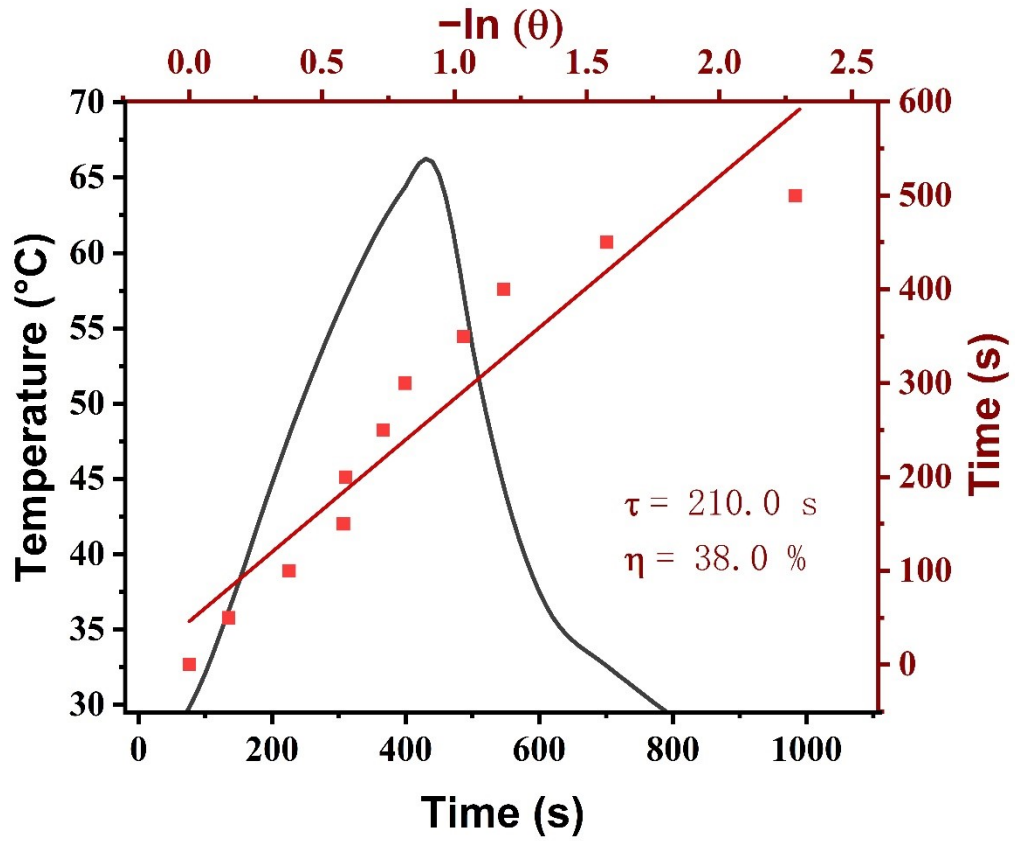

37

38 **Figure S3.** Photothermal conversion efficiency analysis of MXene@TCM-DOX under 808 nm NIR  
 39 laser irradiation. The heating and cooling profile was used to calculate the system time constant,  $\tau$ ,  
 40 and the photothermal conversion efficiency,  $\eta$ .

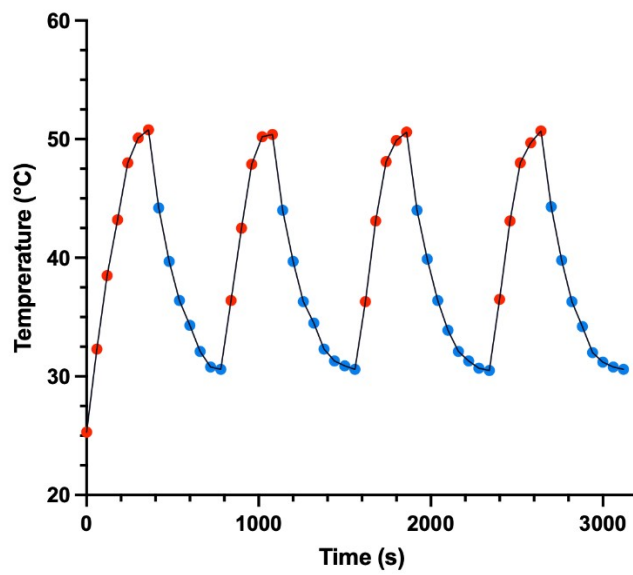

41

42 **Figure S4.** Photothermal stability of MXene@TCM-DOX under repeated 808 nm near-infrared  
 43 laser irradiation.

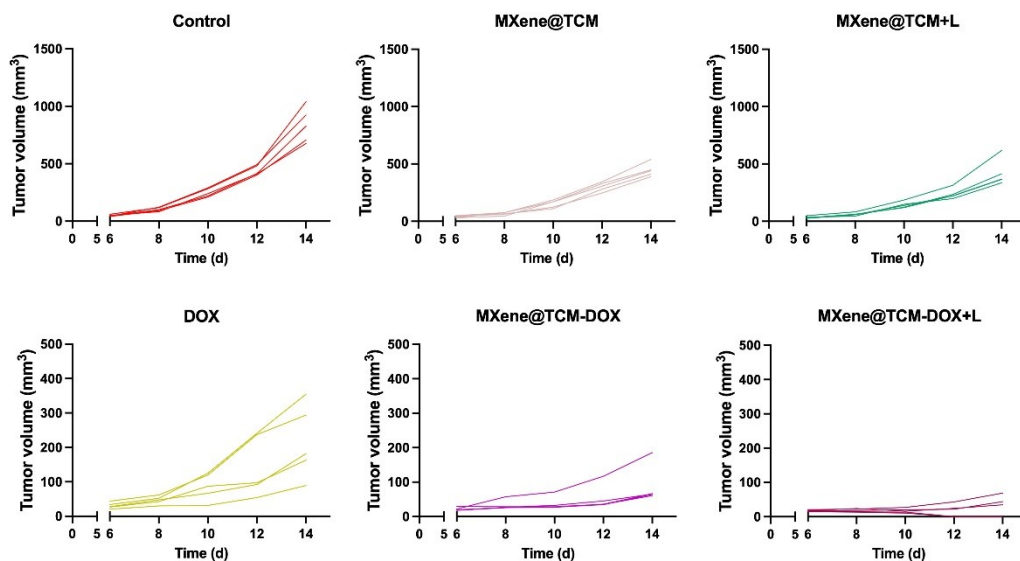

44  
 45 **Figure S5.** Individual tumor growth curves in subcutaneous MB49 tumor-bearing mice under  
 46 different treatments. N=5

47

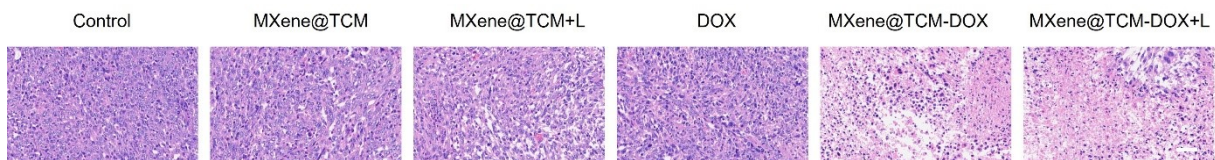

48  
 49 **Figure S6.** Hematoxylin-eosin (H&E) staining of tumor tissues from subcutaneous MB49 tumor-  
 50 bearing mice after different treatments. Scale bar: 100  $\mu$ m.

51

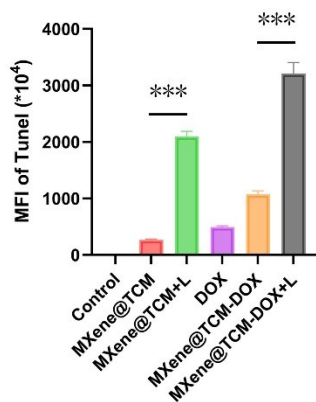

52

53 **Figure S7.** Quantification of TUNEL fluorescence intensity in tumor tissues after different  
54 treatments. Data are mean  $\pm$  SD. \*\*\*P < 0.001.

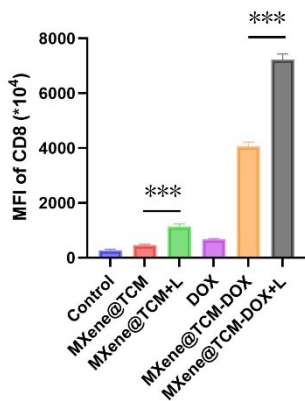

55

56 **Figure S8.** Quantification of CD8 immunofluorescence intensity in tumor tissues after different  
57 treatments. Data are mean  $\pm$  SD. \*\*P < 0.01. \*\*\*P < 0.001

58
