# Supplementary material
Source: Royal Society of Chemistry journal article supplement (doi:10.1039/d6tb00416d)

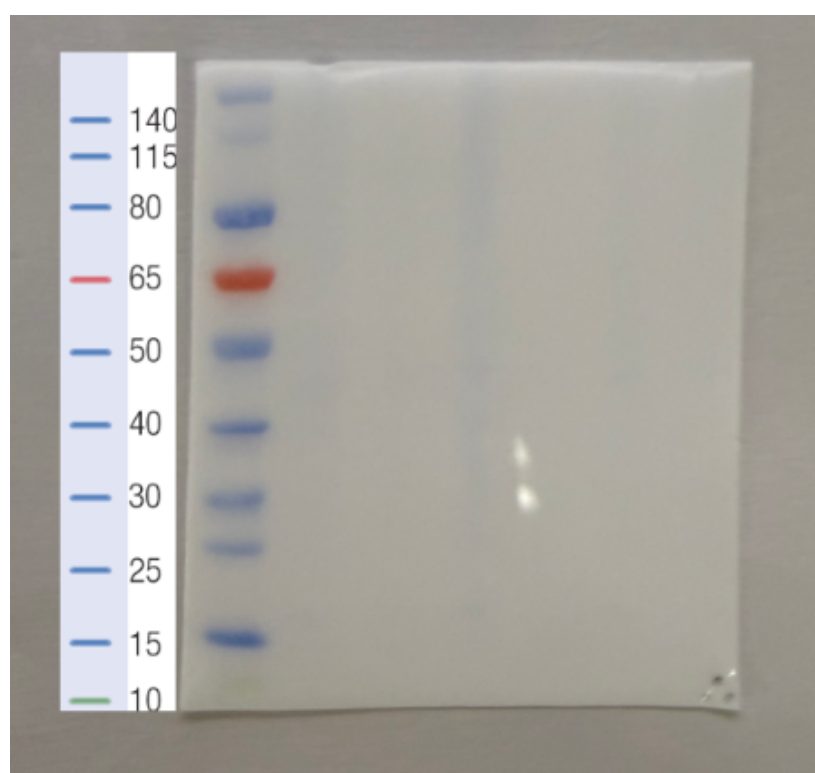

$\beta$ -actin (42KD)

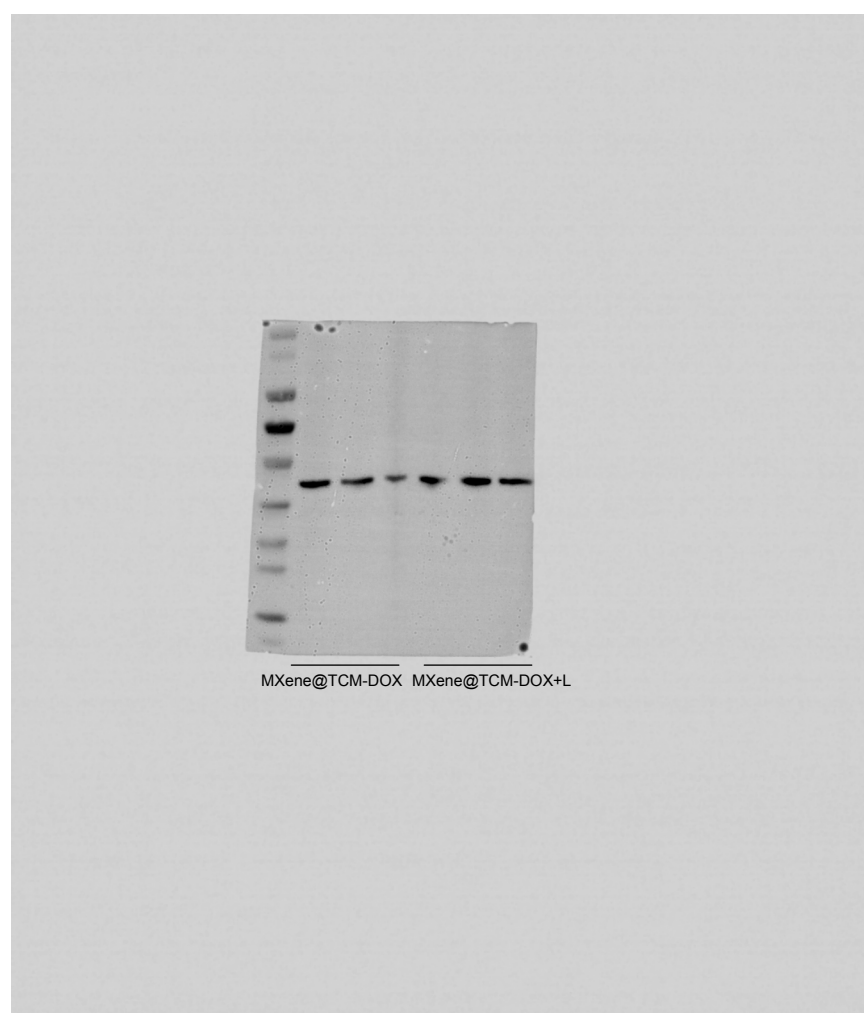

Caspase 3(35KD)

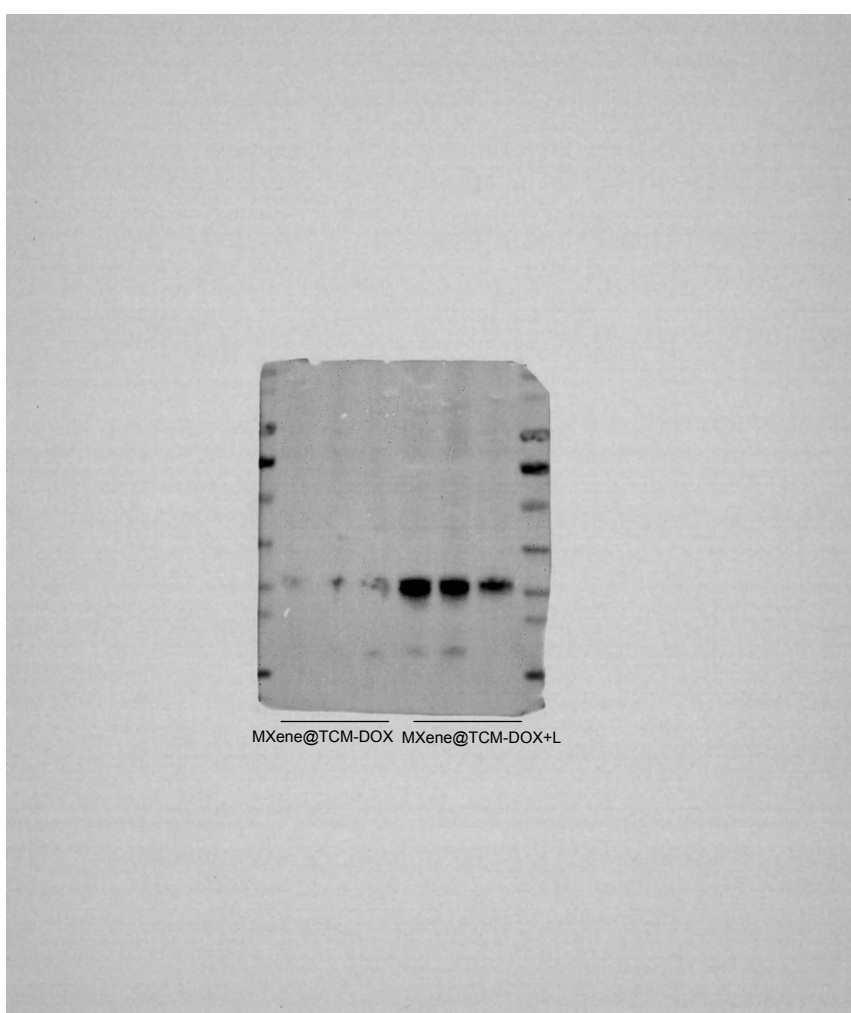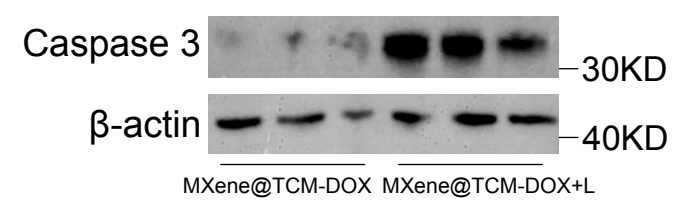

Supplement: d6tb00416d1.pdf [file d6tb00416d1.pdf]
